# Supplementary material for: A New Role for LOC101928437 in Non-Syndromic Intellectual Disability: Findings from a Family-Based Association Test
Source: PLoS One. 2015 Aug 19;10(8):e0135669. doi: 10.1371/journal.pone.0135669 (PMC4545728; doi:10.1371/journal.pone.0135669)
Supplement: S5 Table — (DOCX) [file pone.0135669.s007.docx]

**S5 Table. In silico analysis results for SNPs with significant association in single marker analysis.**

| **SNPs** | **Allele** | **Silicon estimation a** | | | | |
| --- | --- | --- | --- | --- | --- | --- |
| **TFB site** | **Splice site** | **ORF-finder** | **Estimated function b** | **Conservative domain, similar protein and related function estimation** |
| rs6624142 | C | - | - | 65aa | Nonsynonymous  Val>Ile | SRP1 |
| T | - | - | 65aa | No changed |
| rs6622044 | A | - | - | 38aa | Nonsynonymous  Arg>Ser | Cytoplasmic domain, Non-Cytoplasmic domain  TMhelix, Transmembrane region |
| C | - | Gain an acceptor site | 38aa | TMhelix domain loss |
| rs4829463 | G | gain SRY site | - | - | -  - | - |
| A | gain C/EBRPb site | - | - | - |
| rs3116911 | A | - | - | 40aa | Nonsynonymous  Ile>Val | Cytoplasmic domain, Non-Cytoplasmic domain  TMhelix, Transmembrane region |
| G | - | - | 40aa | No change |
| rs5929554 | A | - | Changed significant | 64aa |  | Transposase_22, L1 transposable element |
| T | - | - | No change |
| rs12164331 | C | - | - | - |  | - |
| T | - | - | - | - |
| rs5974392 | T | - | - | 37aa | Nonsense SNP | Non_Cytoplasmic domain, Signal peptide domain with C, H and N regions, signalP-noTM |
| G | - | Gain an acceptor site | - | - |

Abbreviations: TFB site, transcription factor-binding site analysis; ORF-finder, open reading frame finder; SRP1, Improtin subunit alpha-2-like protein domain, which related to interacelluar trafficking and secretion; SRY site, sex-determining region Y gene product; C/EBRPb site, CCAAT/enhancer binding protein beta, a nuclear factor for IL-6 expression.

a The promoter prediction did not include since no any promoter were founded out;
